# Supplementary figures and images for: Chip-based platform for dynamic analysis of NK cell cytolysis mediated by a triplebody
Source: Royal Society of Chemistry journal article supplement (doi:10.1039/c5an02585k), 2016-01-01

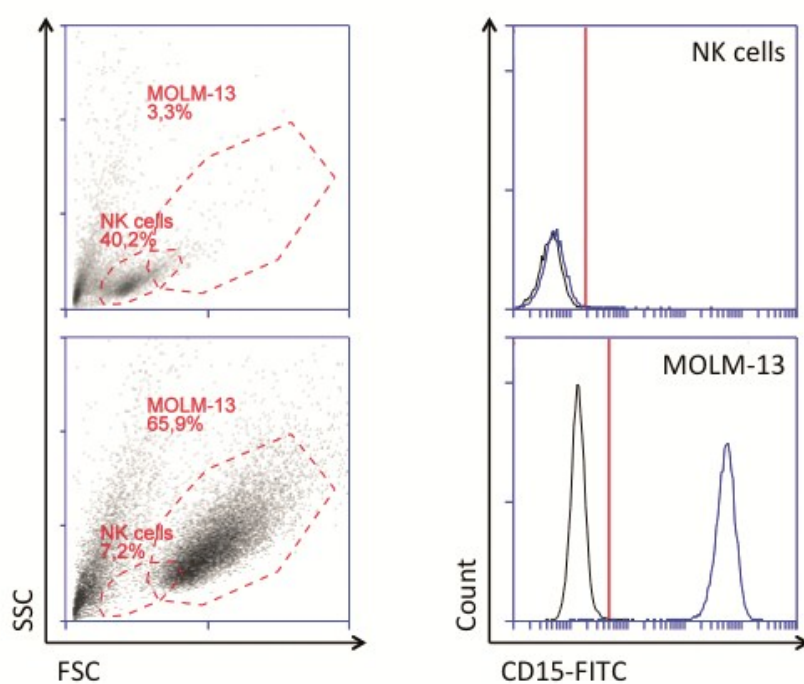

Expression profile of the cd15 myeloid expression marker on molm-13 and nk cells.

Supplement: c5an02585k1.pdf [file c5an02585k1.pdf]
